# Supplementary material for: The Development of VDR-coactivator Inhibitors and Their Evaluation Using Biochemical and Cell-based Assays
Source: Royal Society of Chemistry journal article supplement (doi:10.1039/d4ra04251d), 2014-01-01
Supplement: d4ra04251d1.pdf [file d4ra04251d1.pdf]

Supporting information

**Two-dimensional architecture of N,S-codoped nanocarbon composites embedding few-layer MoS<sub>2</sub> for efficient lithium storage**

Jintao Ren<sup>#</sup>, Dandan Yang<sup>#</sup>, Lei Chen, Zhong-Yong Yuan<sup>\*</sup>

*School of Materials Science and Engineering, Smart Sensing Interdisciplinary Science Center,  
Nankai University, Tianjin 300350, China*

<sup>\*</sup> Corresponding author. *E-mail:* [zyyuan@nankai.edu.cn](mailto:zyyuan@nankai.edu.cn) (Z.-Y. Yuan).

<sup>#</sup> These authors have equal contributions to this work.

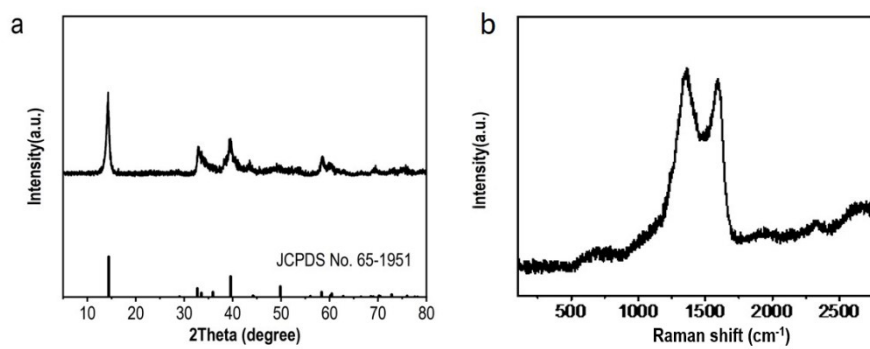

**Fig. S1.** (a) XRD pattern and (b) Raman spectrum of MoS<sub>2</sub>/NCS.

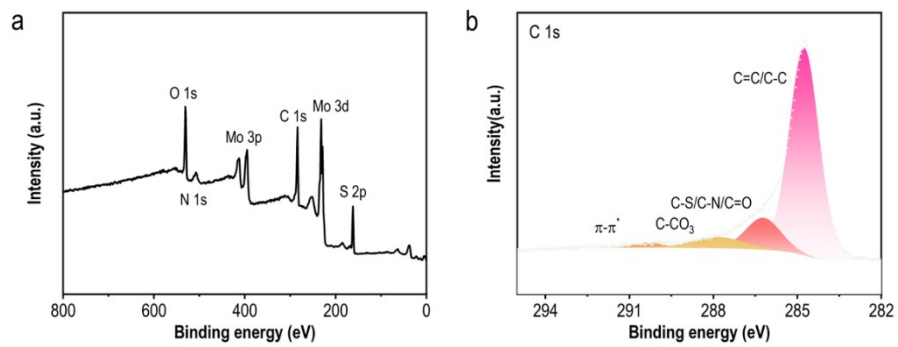

**Fig. S2.** (a) XPS survey scan, (b) high-resolution XPS spectrum of C 1s for MoS<sub>2</sub>/NSCS.

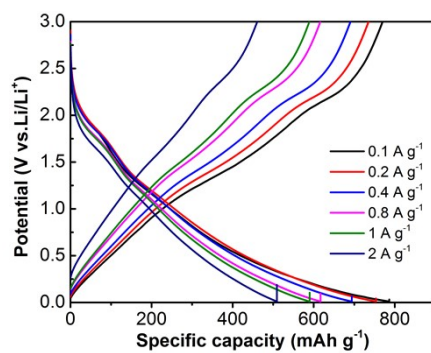

**Fig. S3.** Galvanostatic discharge-charge profiles of the MoS<sub>2</sub>/NSCS at different current densities.

**Table S1.** Compared electrochemical performance of reported similar MoS<sub>2</sub>-C materials with different current rates.

| Electrode materials                                                | Current density (A g <sup>-1</sup> ) | Cycles | Specific capacity (mAh g <sup>-1</sup> ) | Rate performances                                                                                                                       | References |
|--------------------------------------------------------------------|--------------------------------------|--------|------------------------------------------|-----------------------------------------------------------------------------------------------------------------------------------------|------------|
| MoS <sub>2</sub> /NSCS                                             | 0.2                                  | 110    | 731                                      | 776, 731, 691, 617, 592, 396 mAh g <sup>-1</sup> at 0.1, 0.2, 0.4, 0.8, 1.0, and 2.0 A g <sup>-1</sup>                                  | This work. |
| MoS <sub>2</sub> -NC hybrids                                       | 0.2                                  | 300    | 995                                      | 1155, 926, 865, 788, and 574 mAh g <sup>-1</sup> at 0.2, 0.5, 1.0, 2.0 and 5.0 A g <sup>-1</sup>                                        | [1]        |
| MoS <sub>2</sub> -in-Ti <sub>3</sub> C <sub>2</sub> superstructure | 1.0                                  | 500    | 614                                      | 830, 760, 650, 580 and 500 mAh g <sup>-1</sup> at 0.2, 0.5, 1.0, 2.0 and 5.0 A g <sup>-1</sup>                                          | [2]        |
| MoS <sub>2</sub> nanosheet/carbon fiber cloth                      | 0.2                                  | 200    | 635                                      | 1173, 951, 831, 739, 689, 593, 537, 491 and 441 mA h g <sup>-1</sup> at 0.1, 0.2, 0.3, 0.4, 0.5, 0.75, 1, 1.2 and 1.5 A g <sup>-1</sup> | [3]        |
| MoS <sub>2</sub> nanosheet arrays/carbon fiber cloth               | 0.4                                  | 500    | 1023                                     | 1183, 1113, 1088, 1035, 990, and 943 mAh g <sup>-1</sup> at 0.2, 0.4, 0.8, 1.6, 3.2, and 6.4 A g <sup>-1</sup>                          | [4]        |
| MoS <sub>2</sub> on N-doped carbon framework                       | 1.0                                  | 110    | 844                                      | 965, 905, 838, 762, and 702 mAh g <sup>-1</sup> at 0.2, 0.4, 1, 2, and 4 A <sup>-1</sup>                                                | [5]        |
| MoS <sub>2</sub> nanothorns grown on CNTs                          | 0.1                                  | 200    | 982                                      | 960, 905, 859, 820, 793, and 758 mAh g <sup>-1</sup> at 0.1, 0.2, 0.5, 1, 1.5, and 2 A g <sup>-1</sup>                                  | [6]        |
| 1T-MoS <sub>2</sub> on liquid-exfoliated graphene                  | 0.5                                  | 60     | 907                                      | 1335, 1163, 940, 820 and 700 mAh g <sup>-1</sup> at 0.1, 0.2, 0.5, 1.0 and 2.0 A g <sup>-1</sup>                                        | [7]        |
| MoS <sub>2</sub> /C nanosheets                                     | 0.2                                  | 220    | 931                                      | 832, 752, 540, 436 and 344 mAh g <sup>-1</sup> at 0.1, 0.2, 0.5, 1 and 2 A g <sup>-1</sup>                                              | [8]        |

## References

- [1] M. Zhen, J. Wang, S.-q. Guo, B. Shen, *Appl. Surf. Sci.*, 487 (2019) 285-294.
- [2] K. Ma, H. Jiang, Y. Hu, C. Li, *Adv. Funct. Mater.*, 28 (2018) 1804306.
- [3] C. Wang, W. Wan, Y. Huang, J. Chen, H.H. Zhou, X.X. Zhang, *Nanoscale*, 6 (2014) 5351-5358.
- [4] H. Jiang, D. Ren, H. Wang, Y. Hu, S. Guo, H. Yuan, P. Hu, L. Zhang, C. Li, *Adv. Mater.*, 27 (2015) 3687-3695.
- [5] Z.-H. Miao, P.-P. Wang, Y.-C. Xiao, H.-T. Fang, L. Zhen, C.-Y. Xu, *ACS Appl. Mater. Interfaces*, 8 (2016) 33741-33748.
- [6] Z. Zhang, H. Zhao, Y. Teng, X. Chang, Q. Xia, Z. Li, J. Fang, Z. Du, K. Świerczek, *Adv. Energy Mater.*, 8 (2018) 1700174.
- [7] X. Zheng, S. Wang, C. Xiong, G. Hu, *Carbon*, 133 (2018) 162-169.
- [8] B. Chen, H. Lu, N. Zhao, C. Shi, E. Liu, C. He, L. Ma, *J. Power Sources*, 387 (2018) 16-23.
